# Supplementary material for: Particles in a box: novel design and evaluation of an adaptable engineering control enclosure for a common split tube furnace to eliminate occupational exposure to refractory ceramic insulation fibers
Source: Royal Society of Chemistry journal article supplement (doi:10.1039/d3en00041a), 2024-01-01
Supplement: d3en00041a1.pdf [file d3en00041a1.pdf]

**Supplemental Information for:**

**Particles in a box: Novel design and evaluation of an adaptable engineering control enclosure for a common split tube furnace to eliminate occupational exposure to refractory ceramic insulation fibers**

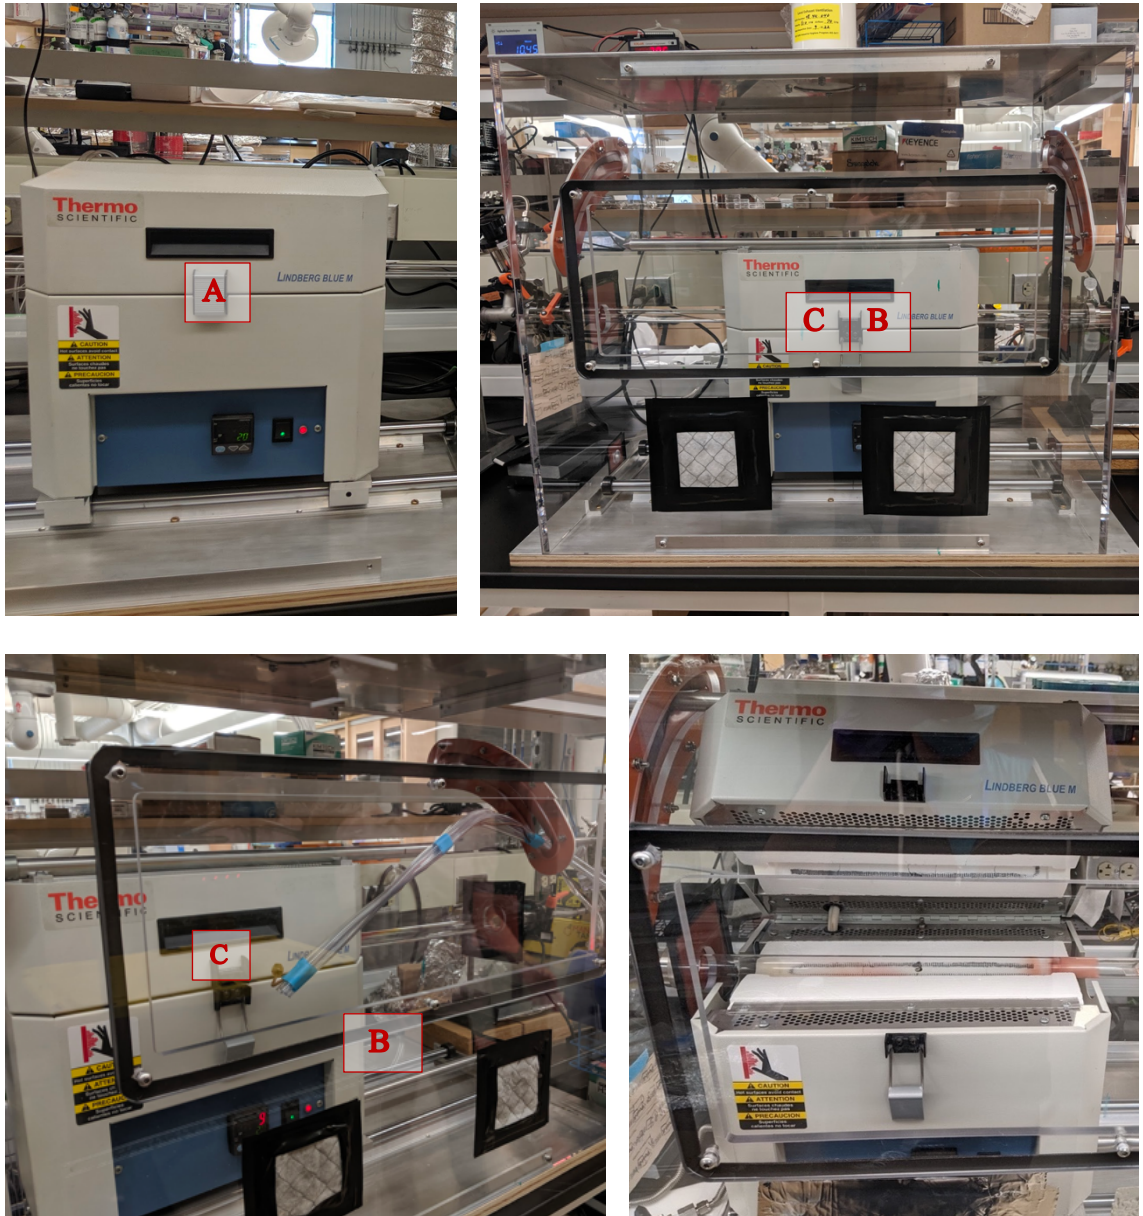

**Figure S1. Air sampling positions.** (A) at the center of the tube furnace shell opening without the enclosure, (B) directly outside of the enclosure at the level of the center of the tube furnace shell opening, and (C) inside of the enclosure at the center of the tube furnace shell opening. For sampling locations B and C, the furnace was moved to the edge of the enclosure interior to gain access to a handle used for opening and closing the shell. The tubing featured in the bottom left photograph was used to sample the air inside the enclosure for DustTrak measurements.

(a)

## Without Enclosure

### Without Enclosure Replica 1

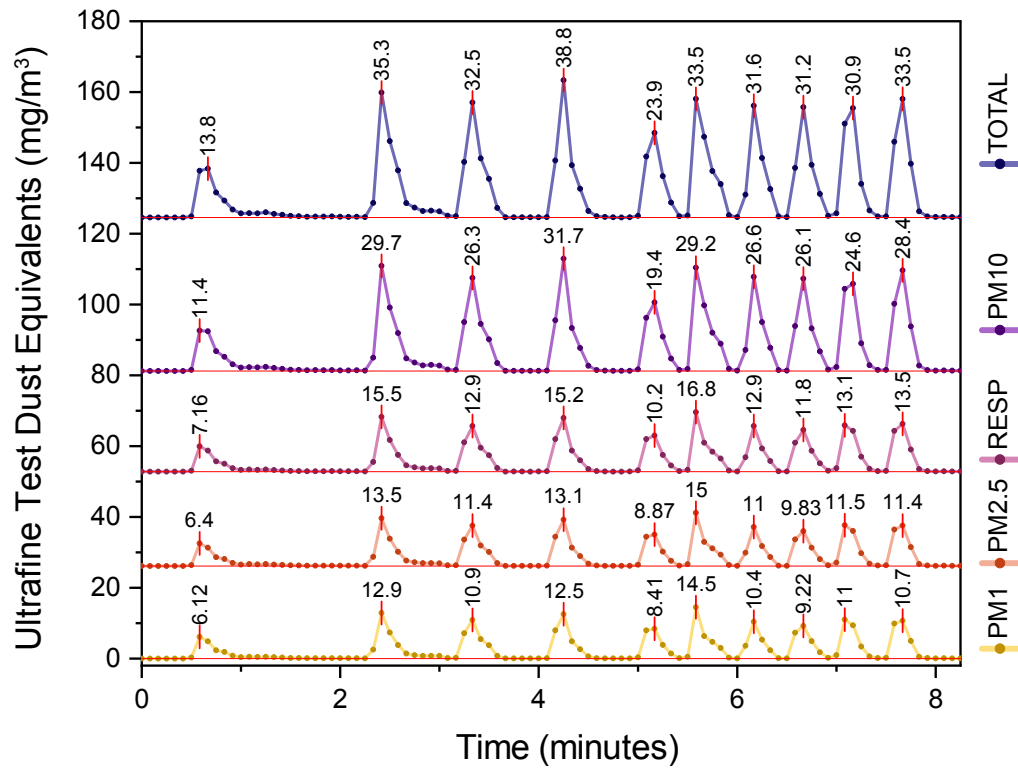

### Without Enclosure Replica 2

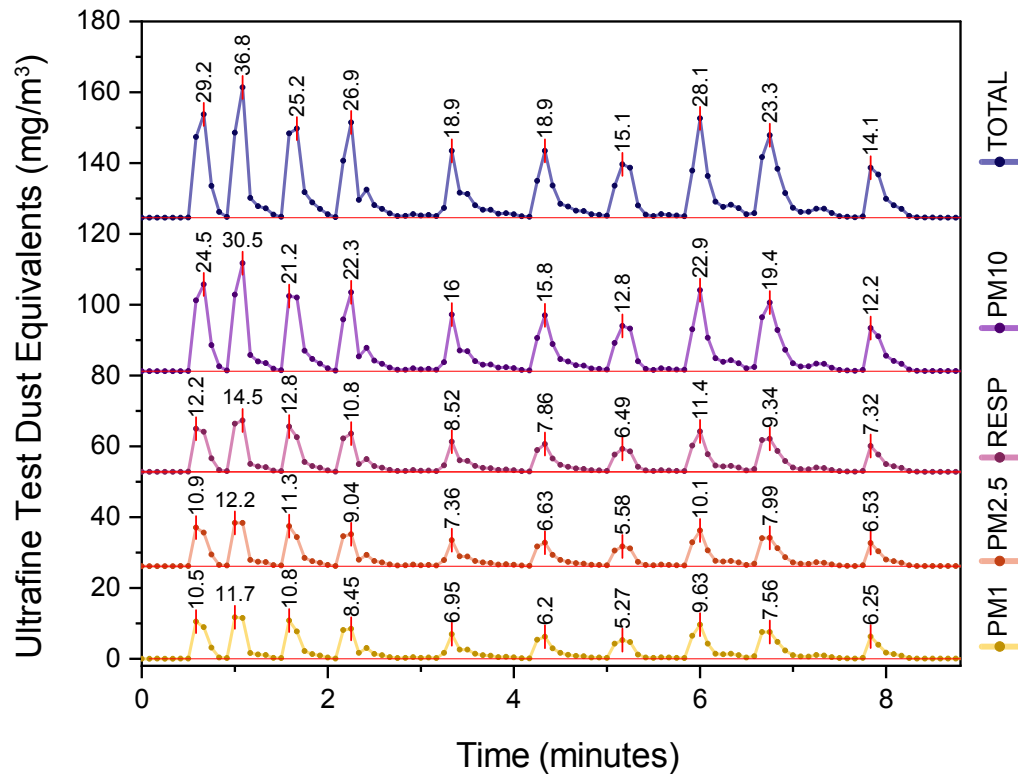

(a)

### Without Enclosure

Without Enclosure Replica 3

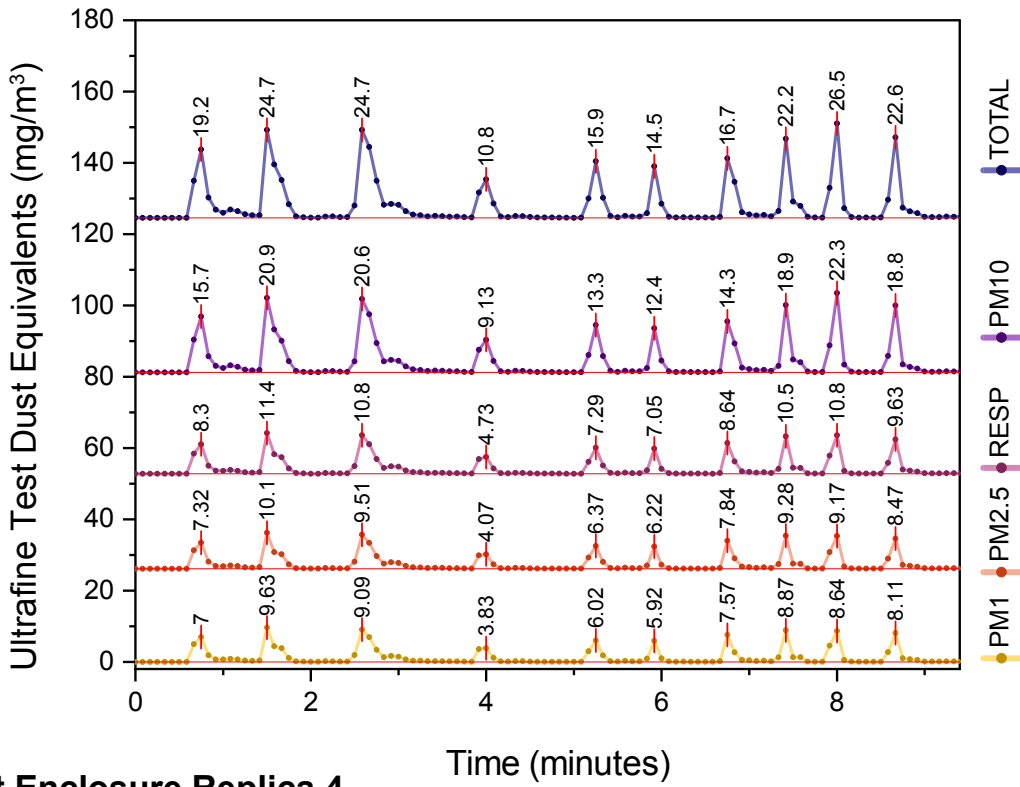

Without Enclosure Replica 4

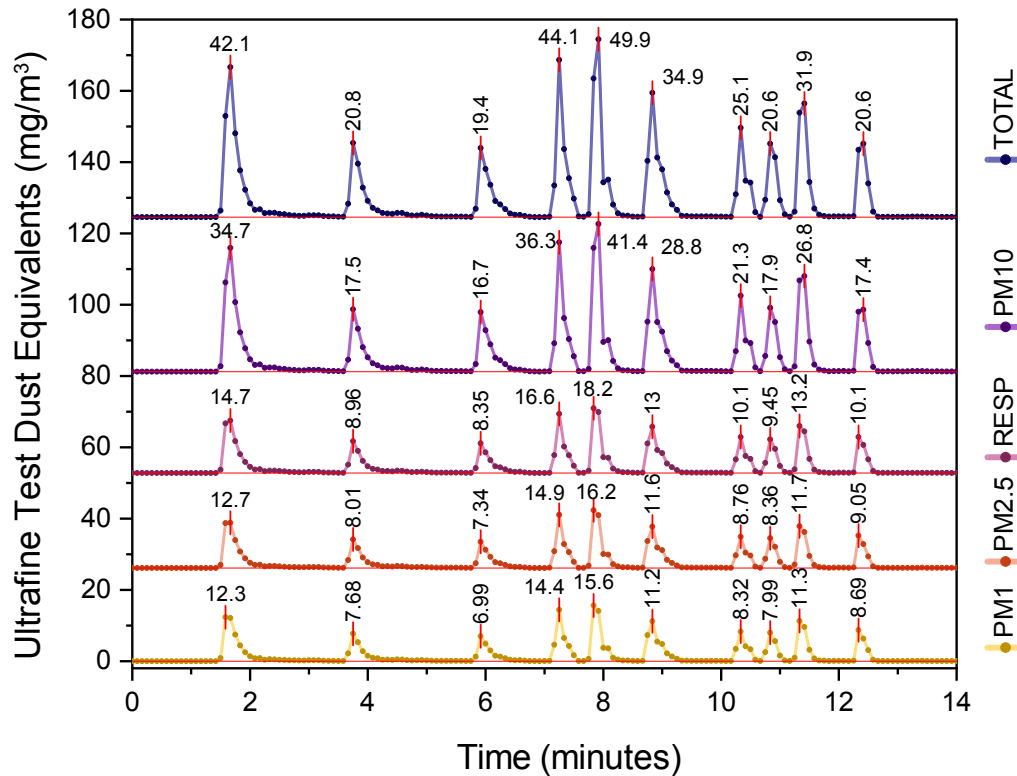

(a)

## Without Enclosure

### Without Enclosure Replica 5

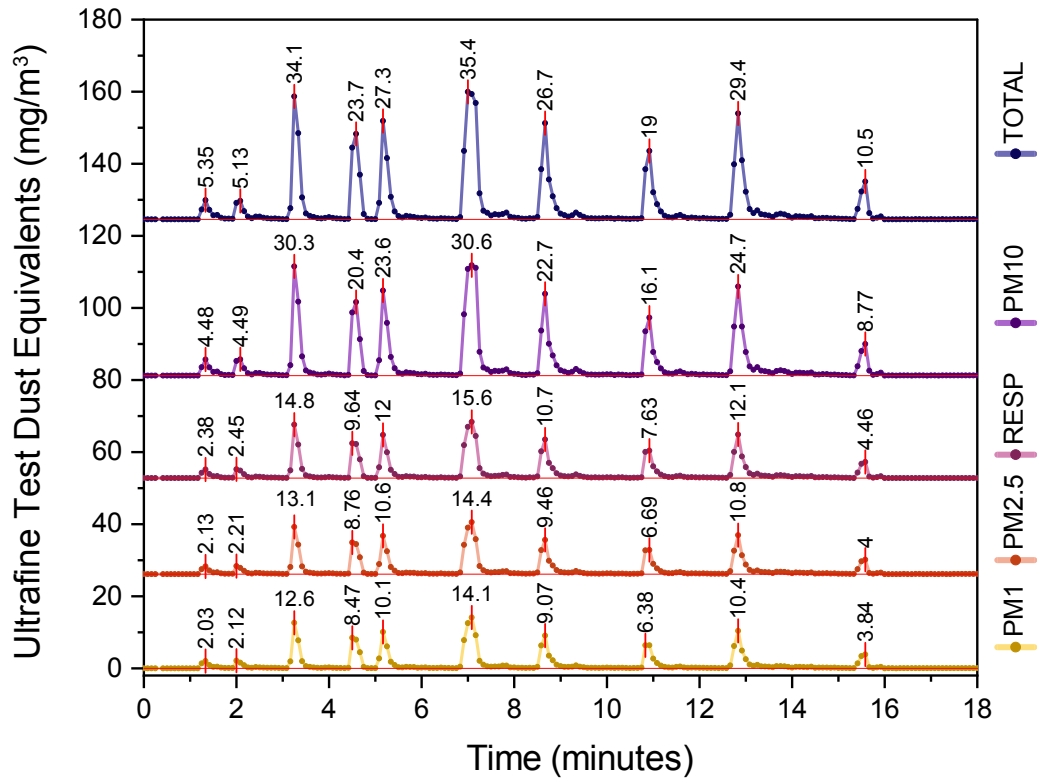

(b)

## With Enclosure

### With Enclosure Replica 1

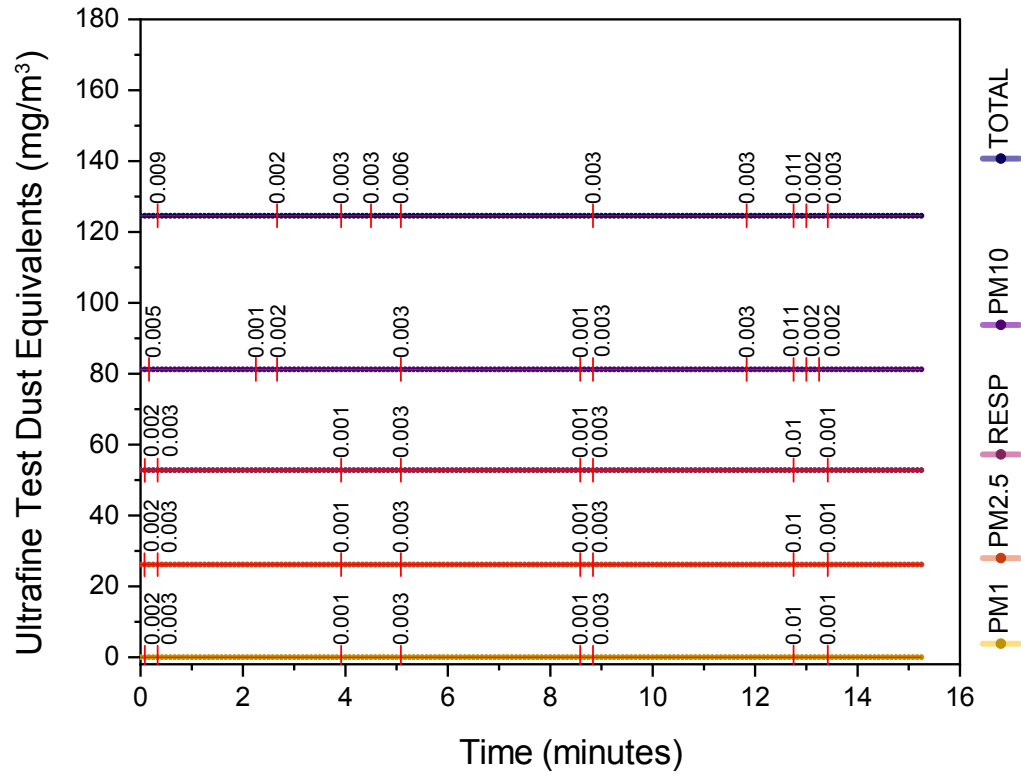

### With Enclosure Replica 2

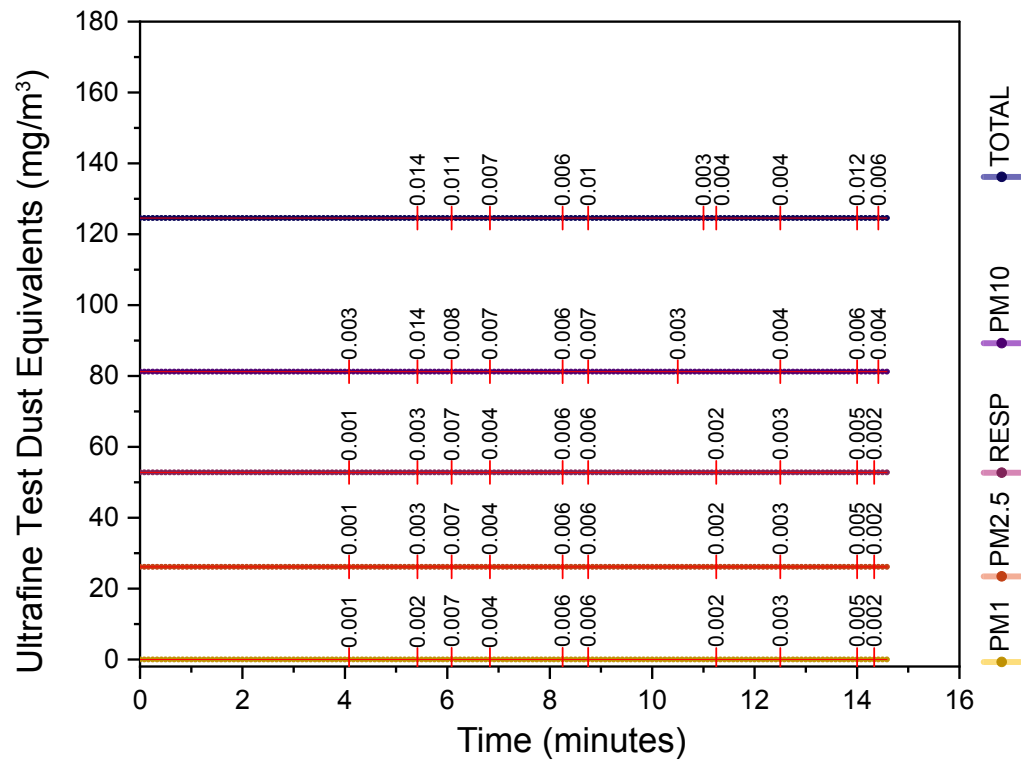

(b)

## With Enclosure

### With Enclosure Replica 3

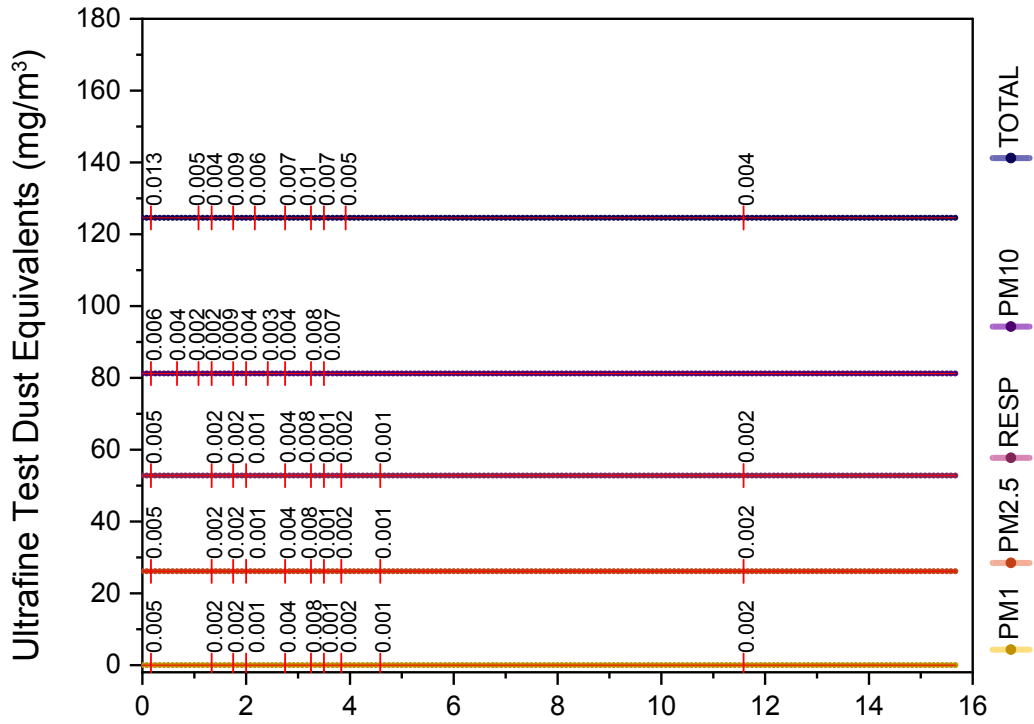

(c)

### Inside Enclosure

#### Inside Enclosure Replica 1

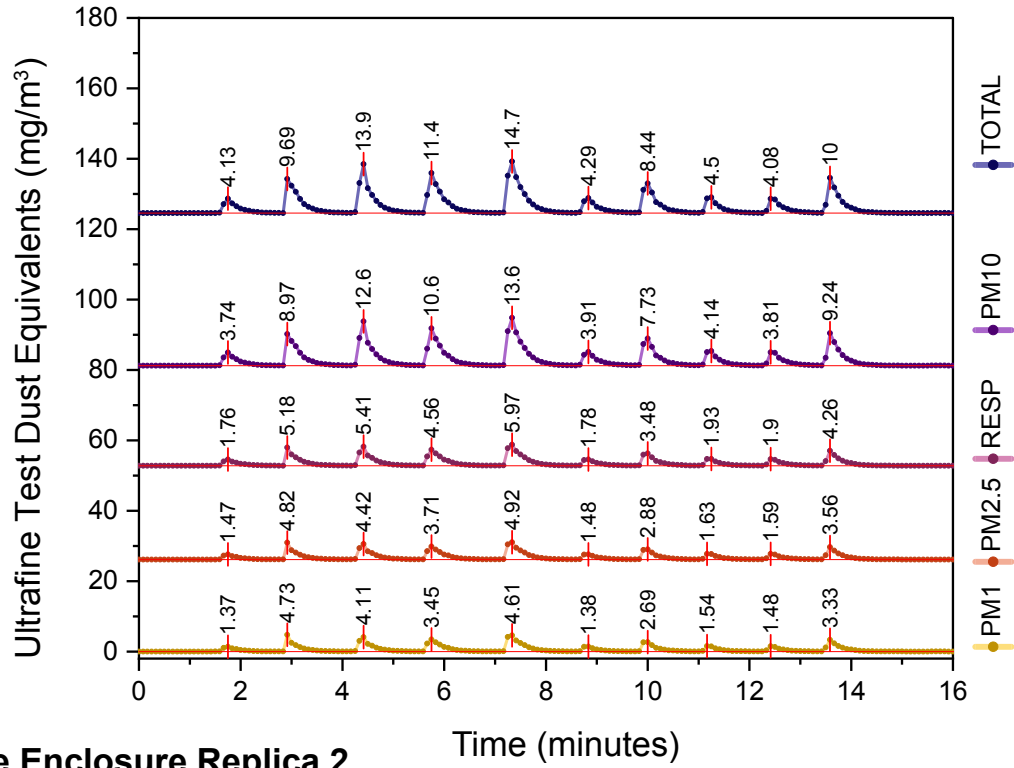

#### Inside Enclosure Replica 2

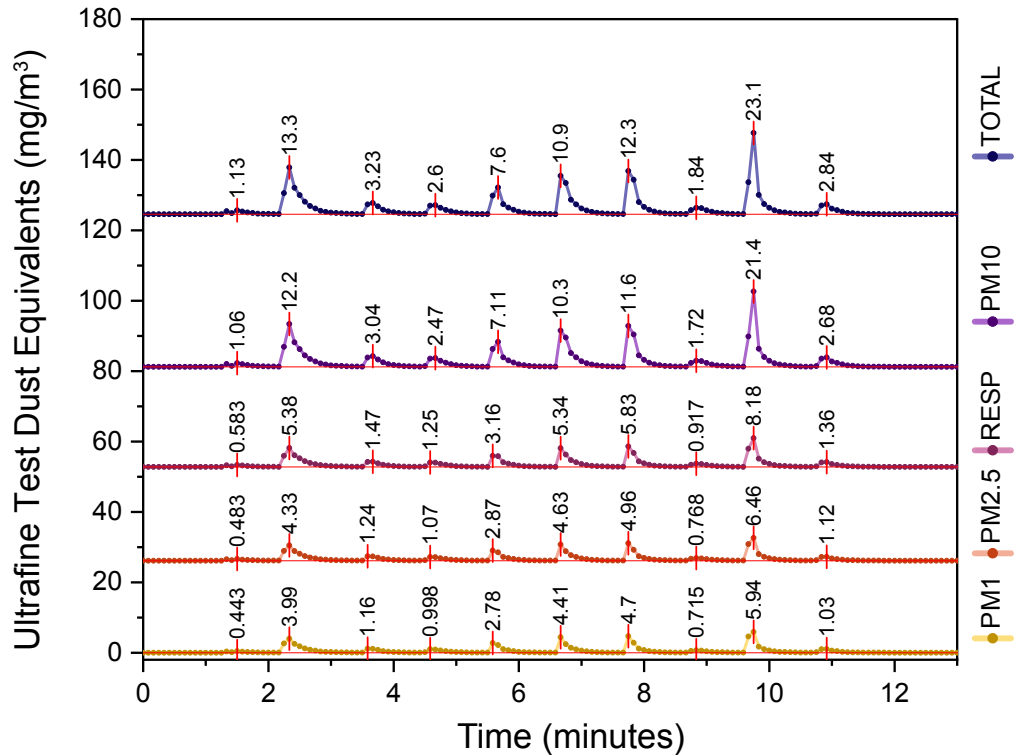



(c)

### Inside Enclosure

#### Inside Enclosure Replica 3

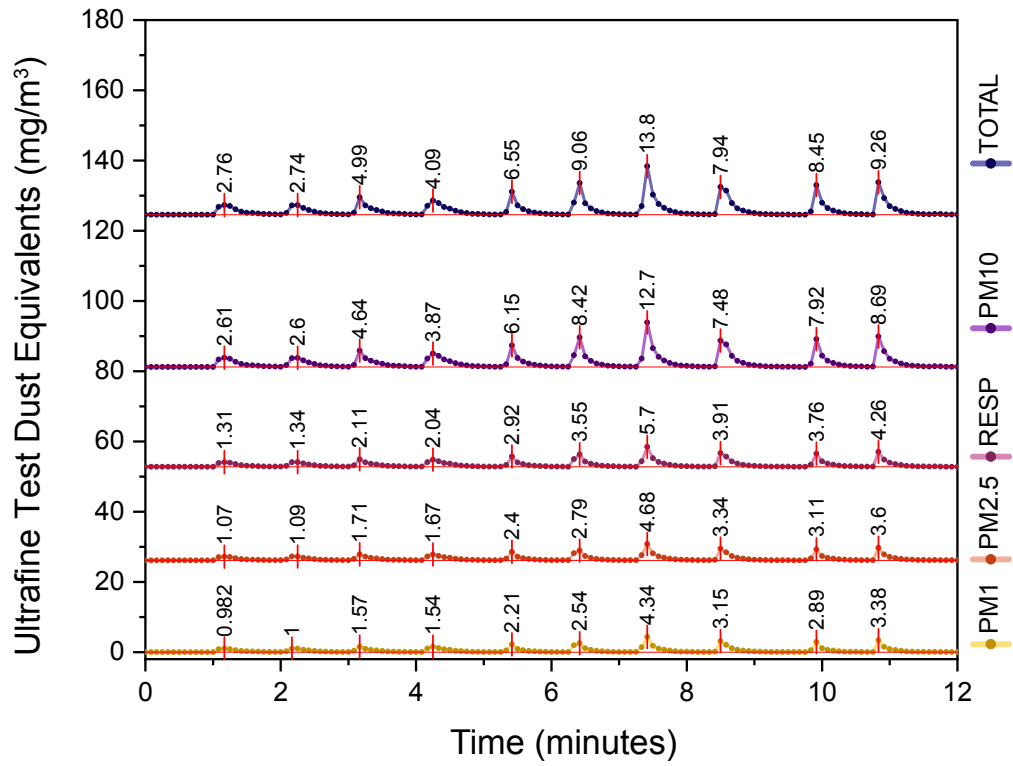

#### Inside Enclosure Replica 4

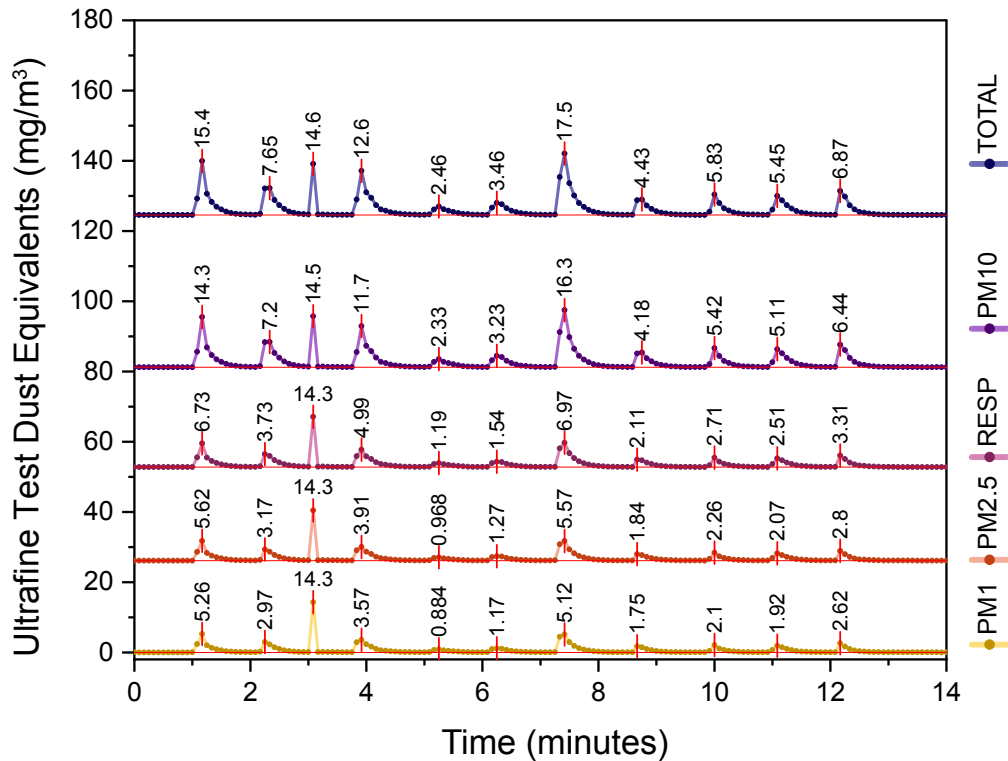

**Figure S2. Furnace insulation real-time aerosol measurements.** Particle mass concentration measured by DustTrak DRX via continuous air sampling under conditions (a) without the enclosure, (b) with the enclosure, and (c) inside of the enclosure (see Figure S1 for details). Each peak represents a furnace insulation agitation event; each agitation event consisting of opening and closing the furnace ten times; each experiment consists of ten agitation events; experimental replicas of each condition are numbered. Under condition (B), there are no discernable peaks corresponding to the release of furnace insulation particles upon agitation; in this case the ten peaks with the largest peak heights are identified.

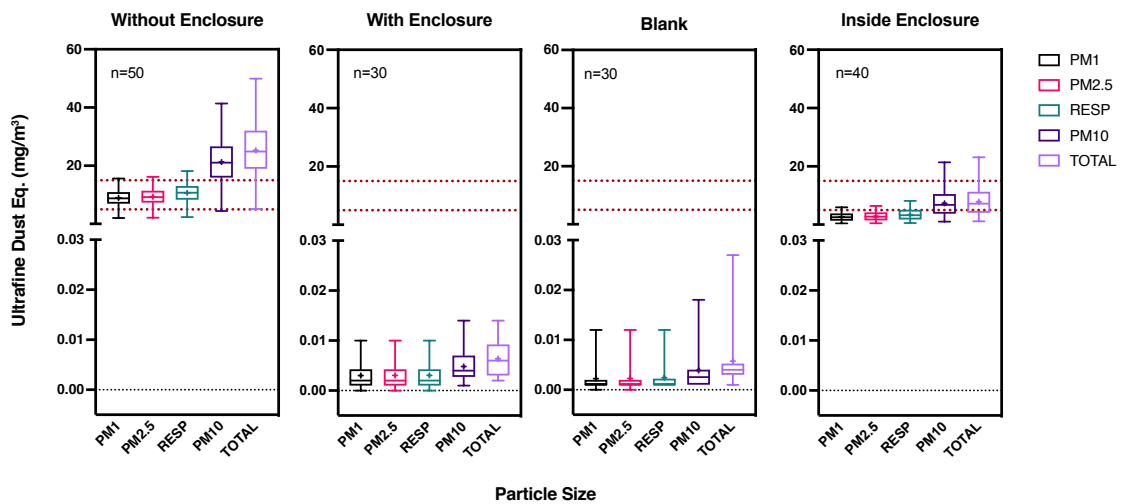

**Figure S3. Aerosol generated and contained by enclosure. RCF aerosol concentration mitigated by enclosure** particle concentration was measured with DustTrak DRX in ISO 12103-1 A1 ultrafine test dust equivalents. Red dotted lines denote the OSHA PEL (8-hour TWA) for total nuisance dust ( $15 \text{ mg/m}^3$ ) and respirable fraction of particulates not otherwise regulated (PNOR) or nuisance dust ( $5 \text{ mg/m}^3$ ).

| Materials List for Benchtop Split- Tube Furnace Enclosure |                                                                                              | Sub-total        |                       |
|-----------------------------------------------------------|----------------------------------------------------------------------------------------------|------------------|-----------------------|
| Part Number                                               | Description                                                                                  |                  |                       |
| McMaster-Carr<br>57485K75                                 | Set Screw Shaft Collar for 20 mm Diameter, Black-Oxide 1215 Carbon Steel                     | 4 pc.s           | \$3.74                |
| 9422K22                                                   | Rod-Sealing Wiper for 3/4" Rod Diameter                                                      | 1 pc             | \$5.95                |
| 9307K874                                                  | Buna-N Rubber Push-In Grommet for 3/4" ID and 1/4" Material Thickness, 5/16" ID, MS-35489-97 | 1 pk             | \$6.33                |
| 9307K69                                                   | Buna-N Rubber Push-In Grommet for 1" ID and 1/4" Material Thickness, 11/16" ID, MS-35489-106 | 1 pk             | \$9.54                |
| 93565K63                                                  | Super-Cushioning Polyethylene Foam Strip, Adhesive-Back, Extra Soft, 1/2" Wide, 3/16" Thick  | 1 pc             | \$6.30                |
| 93275K22                                                  | Resilient Polyurethane Foam Strip, Adhesive-Back, Extra Soft, 1/2" Wide, 3/16" Thick         | 1 pc             | \$27.52               |
| Amazon<br>SBR20-1000mm<br>4SBR20UU                        | Linear Rail<br>Bearing Block                                                                 | 2 pc.s<br>4 pc.s | \$36.48<br>\$18.24    |
| Other:                                                    | Clear Acrylic Box and Door<br>Water-Jet Aluminum Side Lift Plates                            | 1 pc<br>2 pc.s   | \$1,806.00<br>\$32.50 |
| <b>Total</b>                                              |                                                                                              |                  | <b>\$2,087.52</b>     |

**Table S1. Enclosure cost and materials list.**

## Descriptive Statistics

| <b>Without Enclosure</b>                             |               |               |               |               |               |
|------------------------------------------------------|---------------|---------------|---------------|---------------|---------------|
| <b>Ultrafine Dust Equivalents (mg/m<sup>3</sup>)</b> |               |               |               |               |               |
| <b>Particle Size Bins (um)</b>                       | <b>PM1</b>    | <b>PM2.5</b>  | <b>RESP</b>   | <b>PM10</b>   | <b>TOTAL</b>  |
| n                                                    | 50            | 50            | 50            | 50            | 50            |
| Minimum                                              | 2.030         | 2.130         | 2.380         | 4.480         | 5.130         |
| <b>Maximum</b>                                       | <b>15.600</b> | <b>16.200</b> | <b>18.200</b> | <b>41.400</b> | <b>49.900</b> |
| <b>Range</b>                                         | <b>13.570</b> | <b>14.070</b> | <b>15.820</b> | <b>36.920</b> | <b>44.770</b> |
| 10% Percentile                                       | 5.335         | 5.644         | 6.546         | 11.480        | 13.830        |
| 25% Percentile                                       | 6.980         | 7.335         | 8.338         | 15.950        | 18.975        |
| <b>Median</b>                                        | <b>8.780</b>  | <b>9.225</b>  | <b>10.750</b> | <b>21.050</b> | <b>24.900</b> |
| 75% Percentile                                       | 10.925        | 11.425        | 13.025        | 26.650        | 32.050        |
| 90% Percentile                                       | 12.870        | 13.460        | 15.470        | 30.590        | 36.660        |
| 95% CI of median                                     |               |               |               |               |               |
| Actual confidence level                              | 96.72%        | 96.72%        | 96.72%        | 96.72%        | 96.72%        |
| Lower confidence limit                               | 7.990         | 8.360         | 9.450         | 17.900        | 20.800        |
| Upper confidence limit                               | 10.400        | 10.800        | 12.100        | 24.500        | 29.200        |
| <b>Mean</b>                                          | <b>8.964</b>  | <b>9.375</b>  | <b>10.677</b> | <b>21.245</b> | <b>25.306</b> |
| <b>Std. Deviation</b>                                | <b>3.042</b>  | <b>3.136</b>  | <b>3.546</b>  | <b>7.922</b>  | <b>9.553</b>  |
| Std. Error of Mean                                   | 0.430         | 0.444         | 0.501         | 1.120         | 1.351         |
| Lower 95% CI of mean                                 | 8.100         | 8.484         | 9.669         | 18.994        | 22.591        |
| Upper 95% CI of mean                                 | 9.829         | 10.266        | 11.685        | 23.497        | 28.021        |
| <b>Coefficient of variation</b>                      | <b>33.93%</b> | <b>33.45%</b> | <b>33.21%</b> | <b>37.29%</b> | <b>37.75%</b> |

| <b>With Enclosure</b>                                |               |               |               |               |               |
|------------------------------------------------------|---------------|---------------|---------------|---------------|---------------|
| <b>Ultrafine Dust Equivalents (mg/m<sup>3</sup>)</b> |               |               |               |               |               |
| <b>Particle Size Bins (um)</b>                       | <b>PM1</b>    | <b>PM2.5</b>  | <b>RESP</b>   | <b>PM10</b>   | <b>TOTAL</b>  |
| n                                                    | 30            | 30            | 30            | 30            | 30            |
| Minimum                                              | 0.000         | 0.000         | 0.000         | 0.001         | 0.002         |
| <b>Maximum</b>                                       | <b>0.010</b>  | <b>0.010</b>  | <b>0.010</b>  | <b>0.014</b>  | <b>0.014</b>  |
| <b>Range</b>                                         | <b>0.010</b>  | <b>0.010</b>  | <b>0.010</b>  | <b>0.013</b>  | <b>0.012</b>  |
| 10% Percentile                                       | 0.001         | 0.001         | 0.001         | 0.002         | 0.003         |
| 25% Percentile                                       | 0.001         | 0.001         | 0.001         | 0.003         | 0.003         |
| <b>Median</b>                                        | <b>0.002</b>  | <b>0.002</b>  | <b>0.002</b>  | <b>0.004</b>  | <b>0.006</b>  |
| 75% Percentile                                       | 0.004         | 0.004         | 0.004         | 0.007         | 0.009         |
| 90% Percentile                                       | 0.007         | 0.007         | 0.007         | 0.009         | 0.012         |
| 95% CI of median                                     |               |               |               |               |               |
| Actual confidence level                              | 95.72%        | 95.72%        | 95.72%        | 95.72%        | 95.72%        |
| Lower confidence limit                               | 0.002         | 0.002         | 0.002         | 0.003         | 0.004         |
| Upper confidence limit                               | 0.003         | 0.003         | 0.003         | 0.006         | 0.007         |
| <b>Mean</b>                                          | <b>0.003</b>  | <b>0.003</b>  | <b>0.003</b>  | <b>0.005</b>  | <b>0.006</b>  |
| <b>Std. Deviation</b>                                | <b>0.002</b>  | <b>0.002</b>  | <b>0.002</b>  | <b>0.003</b>  | <b>0.003</b>  |
| Std. Error of Mean                                   | 0.000         | 0.000         | 0.000         | 0.001         | 0.001         |
| Lower 95% CI of mean                                 | 0.002         | 0.002         | 0.002         | 0.004         | 0.005         |
| Upper 95% CI of mean                                 | 0.004         | 0.004         | 0.004         | 0.006         | 0.008         |
| <b>Coefficient of variation</b>                      | <b>81.18%</b> | <b>80.05%</b> | <b>80.05%</b> | <b>63.66%</b> | <b>54.37%</b> |

| <b>Blank</b>                    |                                                      |                |                |                |               |
|---------------------------------|------------------------------------------------------|----------------|----------------|----------------|---------------|
| <b>Particle Size Bins (um)</b>  | <b>Ultrafine Dust Equivalents (mg/m<sup>3</sup>)</b> |                |                |                |               |
|                                 | <b>PM1</b>                                           | <b>PM2.5</b>   | <b>RESP</b>    | <b>PM10</b>    | <b>TOTAL</b>  |
| <b>n</b>                        | 30                                                   | 30             | 30             | 30             | 30            |
| <b>Minimum</b>                  | 0.000                                                | 0.000          | 0.001          | 0.001          | 0.001         |
| <b>Maximum</b>                  | <b>0.012</b>                                         | <b>0.012</b>   | <b>0.012</b>   | <b>0.018</b>   | <b>0.027</b>  |
| <b>Range</b>                    | <b>0.012</b>                                         | <b>0.012</b>   | <b>0.011</b>   | <b>0.017</b>   | <b>0.026</b>  |
| 10% Percentile                  | 0.000                                                | 0.000          | 0.001          | 0.001          | 0.002         |
| 25% Percentile                  | 0.001                                                | 0.001          | 0.001          | 0.001          | 0.003         |
| <b>Median</b>                   | <b>0.001</b>                                         | <b>0.001</b>   | <b>0.001</b>   | <b>0.003</b>   | <b>0.004</b>  |
| 75% Percentile                  | 0.002                                                | 0.002          | 0.002          | 0.004          | 0.005         |
| 90% Percentile                  | 0.008                                                | 0.008          | 0.008          | 0.013          | 0.014         |
| 95% CI of median                |                                                      |                |                |                |               |
| Actual confidence level         | 95.72%                                               | 95.72%         | 95.72%         | 95.72%         | 95.72%        |
| Lower confidence limit          | 0.001                                                | 0.001          | 0.001          | 0.001          | 0.003         |
| Upper confidence limit          | 0.002                                                | 0.002          | 0.002          | 0.004          | 0.005         |
| <b>Mean</b>                     | <b>0.002</b>                                         | <b>0.002</b>   | <b>0.002</b>   | <b>0.004</b>   | <b>0.006</b>  |
| <b>Std. Deviation</b>           | <b>0.003</b>                                         | <b>0.003</b>   | <b>0.003</b>   | <b>0.004</b>   | <b>0.005</b>  |
| Std. Error of Mean              | 0.001                                                | 0.001          | 0.001          | 0.001          | 0.001         |
| Lower 95% CI of mean            | 0.001                                                | 0.001          | 0.001          | 0.002          | 0.004         |
| Upper 95% CI of mean            | 0.003                                                | 0.003          | 0.004          | 0.005          | 0.008         |
| <b>Coefficient of variation</b> | <b>133.39%</b>                                       | <b>130.53%</b> | <b>120.51%</b> | <b>110.51%</b> | <b>92.85%</b> |

| <b>Inside Enclosure</b>         |                                                      |               |               |               |               |
|---------------------------------|------------------------------------------------------|---------------|---------------|---------------|---------------|
| <b>Particle Size Bins (um)</b>  | <b>Ultrafine Dust Equivalents (mg/m<sup>3</sup>)</b> |               |               |               |               |
|                                 | <b>PM1</b>                                           | <b>PM2.5</b>  | <b>RESP</b>   | <b>PM10</b>   | <b>TOTAL</b>  |
| <b>n</b>                        | 40                                                   | 40            | 40            | 40            | 40            |
| <b>Minimum</b>                  | 0.443                                                | 0.483         | 0.583         | 1.060         | 1.130         |
| <b>Maximum</b>                  | <b>5.940</b>                                         | <b>6.460</b>  | <b>8.180</b>  | <b>21.400</b> | <b>23.100</b> |
| <b>Range</b>                    | <b>5.497</b>                                         | <b>5.977</b>  | <b>7.597</b>  | <b>20.340</b> | <b>21.970</b> |
| 10% Percentile                  | 0.984                                                | 1.070         | 1.256         | 2.483         | 2.614         |
| 25% Percentile                  | 1.373                                                | 1.473         | 1.765         | 3.758         | 4.083         |
| <b>Median</b>                   | <b>2.580</b>                                         | <b>2.795</b>  | <b>3.235</b>  | <b>6.775</b>  | <b>7.235</b>  |
| 75% Percentile                  | 3.885                                                | 4.225         | 5.133         | 10.525        | 11.275        |
| 90% Percentile                  | 4.727                                                | 4.956         | 5.956         | 13.510        | 14.620        |
| 95% CI of median                |                                                      |               |               |               |               |
| Actual confidence level         | 96.15%                                               | 96.15%        | 96.15%        | 96.15%        | 96.15%        |
| Lower confidence limit          | 1.540                                                | 1.670         | 2.040         | 4.140         | 4.430         |
| Upper confidence limit          | 3.330                                                | 3.560         | 4.260         | 8.690         | 9.260         |
| <b>Mean</b>                     | <b>2.646</b>                                         | <b>2.834</b>  | <b>3.410</b>  | <b>7.330</b>  | <b>7.882</b>  |
| <b>Std. Deviation</b>           | <b>1.485</b>                                         | <b>1.585</b>  | <b>1.930</b>  | <b>4.589</b>  | <b>4.966</b>  |
| Std. Error of Mean              | 0.235                                                | 0.251         | 0.305         | 0.726         | 0.785         |
| Lower 95% CI of mean            | 2.171                                                | 2.327         | 2.792         | 5.863         | 6.293         |
| Upper 95% CI of mean            | 3.120                                                | 3.341         | 4.027         | 8.798         | 9.470         |
| <b>Coefficient of variation</b> | <b>56.13%</b>                                        | <b>55.93%</b> | <b>56.60%</b> | <b>62.61%</b> | <b>63.01%</b> |

**Table S2. Summary tables of peak statistics presented in Figure S3.**

### Without Enclosure Blank

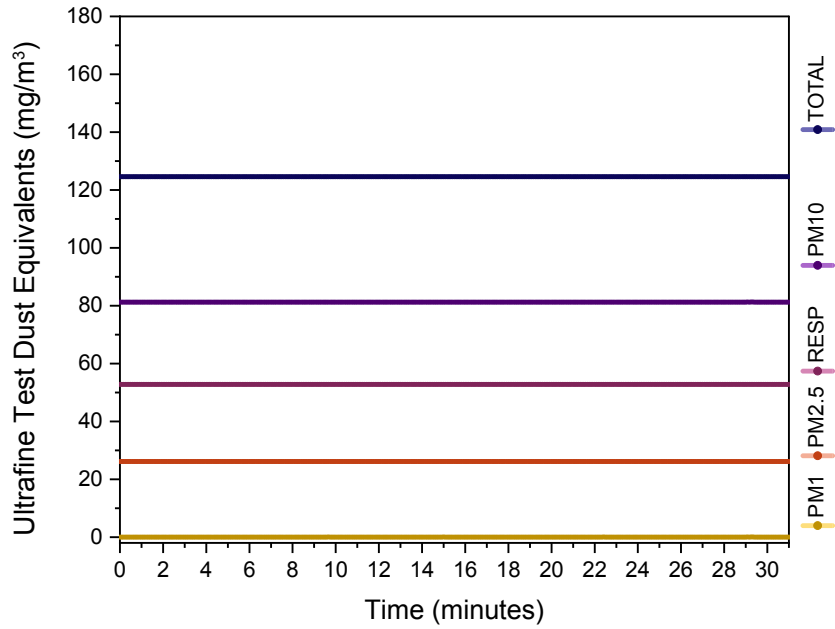

### With Enclosure Blank A

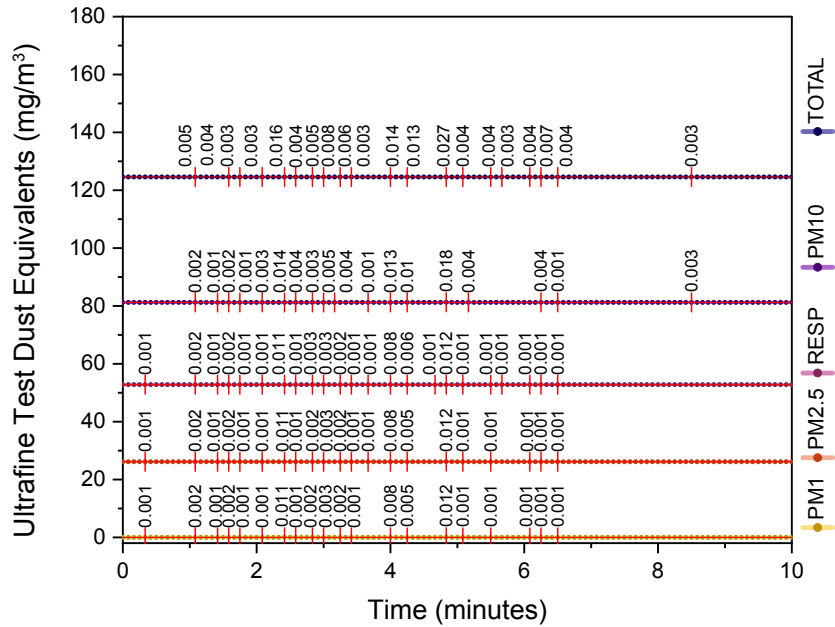

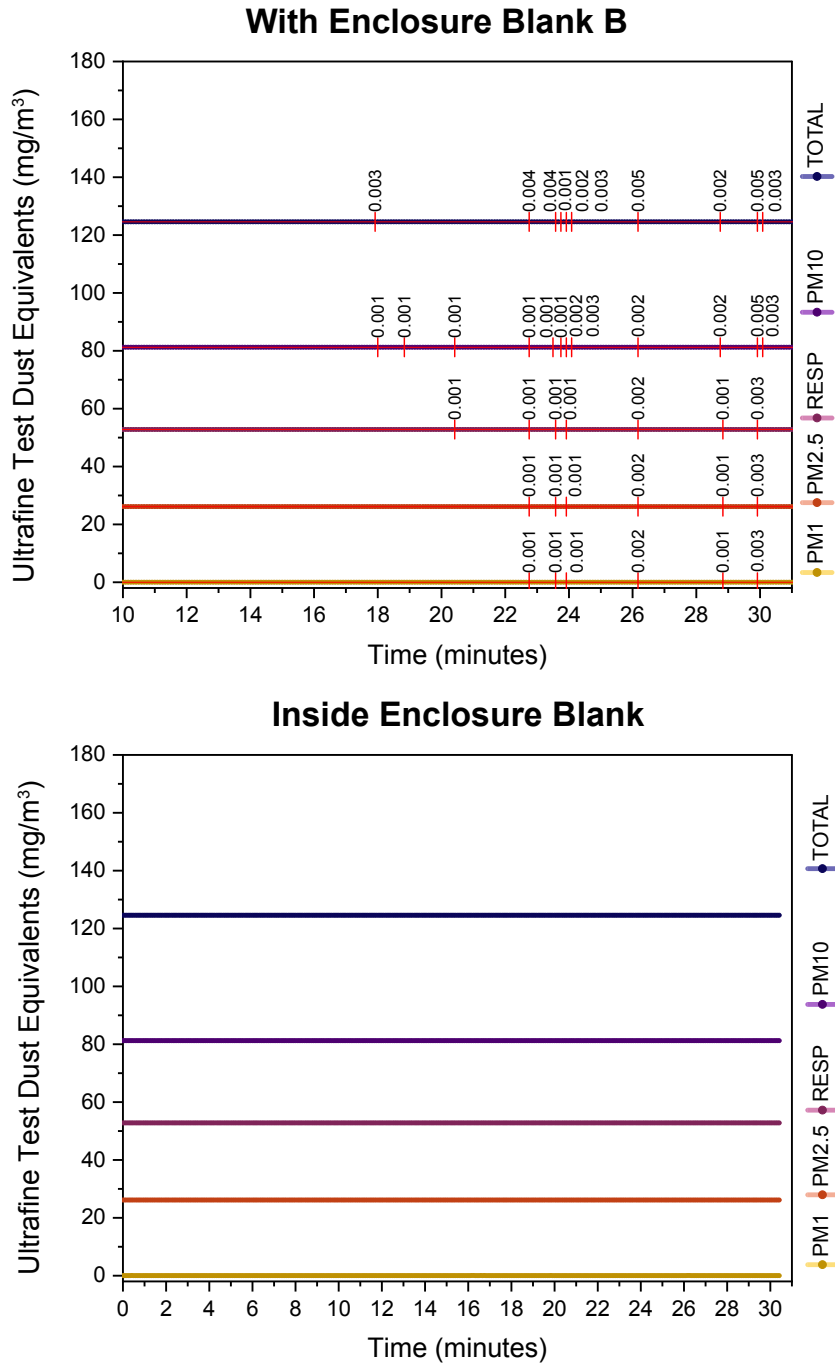

**Figure S4. Real-time background room dust.** Particle concentrations measured by DustTrak DRX via continuous air sampling under conditions (A) without the enclosure, (B) with the enclosure, and (C) inside of the enclosure (see Figure S1 for details) without any furnace insulation agitation. Sampling condition (B) with the enclosure plot is shown in two separate plots for clarity.

***DustTrak DRX particle size segregation bins in micrometers:***

$$PM1 = PM2.5 - PM1-2.5$$

$$PM2.5 = \text{Photometric signal} \times \text{calibration factor}$$

$$\text{Respirable} / PM4 = PM2.5 + PM2.5-4$$

$$PM10 / \text{Thoracic} = PM4 + PM4-10$$

$$TPM = PM10 + PM>10$$

***Peak finding and filtering criteria (in Origin)***

1. *Furnace Insulation Aerosol Sampling/ Measurements:* Peak finding criteria was set to local maximum method with 2 local points. Peak filtering was set to 10 peaks per experiment for every particle size bin. Except for (B) “with enclosure” Replica 1, PM1, PM2.5, RESP, where an additional peak was identified in each size bin by lowering the peak local maximum finding criterion to 1 local point. Lowering the criteria allowed for identification of 8 peaks per size bin (instead of 7 peaks per size bin). Peak filtering was set to 11 peaks per experiment for (C) “inside enclosure” Replica 4, where an anomalous single point peak ~ 3 min was removed in the statistical analysis.
2. *With Enclosure Blank:* Peak finding criteria was set to local maximum method with 1 local point. Peak filtering was set to 30 peaks for every particle size bin.

When fewer than the expected number of peaks are found in a particular experiment, zero value peak heights are added to the statistical analysis until the appropriate comparable sample size is reached (i.e., “with enclosure” Replica 1, PM1, PM2.5, RESP 2 zero peaks added, “with enclosure” blank PM1 4 zero peaks added, “with enclosure” blank PM2.5 3 zero peaks added).



### ***Peak fiber concentration calculation***

Sample fiber masses were calculated for a subset of fibers sampled without the enclosure. Only fibers, which met the following criteria:  $>5 \mu\text{m}$  long,  $<3 \mu\text{m}$  diameter, and with an aspect ratio  $\geq 5:1$  were used to calculate statistics on fiber mass. Only “whole” fibers were considered, i.e., fibers for which both ends were visible while measuring their dimensions under TEM. The volume of each fiber was calculated from a measured length and width, and the fiber was assumed to be cylindrical. Using the density of the fiber, the mass of individual fibers was calculated. As airborne dusts consist of a wide distribution of fiber masses, the estimated peak fiber concentration (Table 2) remain constrained by the sample fiber masses used herein. A total of 85 fibers were analyzed. The standard deviation of the sample fiber masses was greater than the mean mass, indicating a skewed distribution. Therefore, the median mass along with a 97% confidence interval of the median (upper and lower limits) and the range were used to approximate the mass of a single particle.

|                                 | <b>Length (um)</b> | <b>Width (um)</b> | <b>Mass (ng)</b> |
|---------------------------------|--------------------|-------------------|------------------|
| <b>Mean</b>                     | 15.21              | 1.07              | 0.05             |
| <b>Standard Deviation</b>       | 8.72               | 0.54              | 0.08             |
| <b>Coefficient of variation</b> | 57%                | 50%               | 150%             |

We note that while the standard deviation of the lengths and widths is lower than that of the mean values, the standard deviations are still over 50% of the means, respectively.

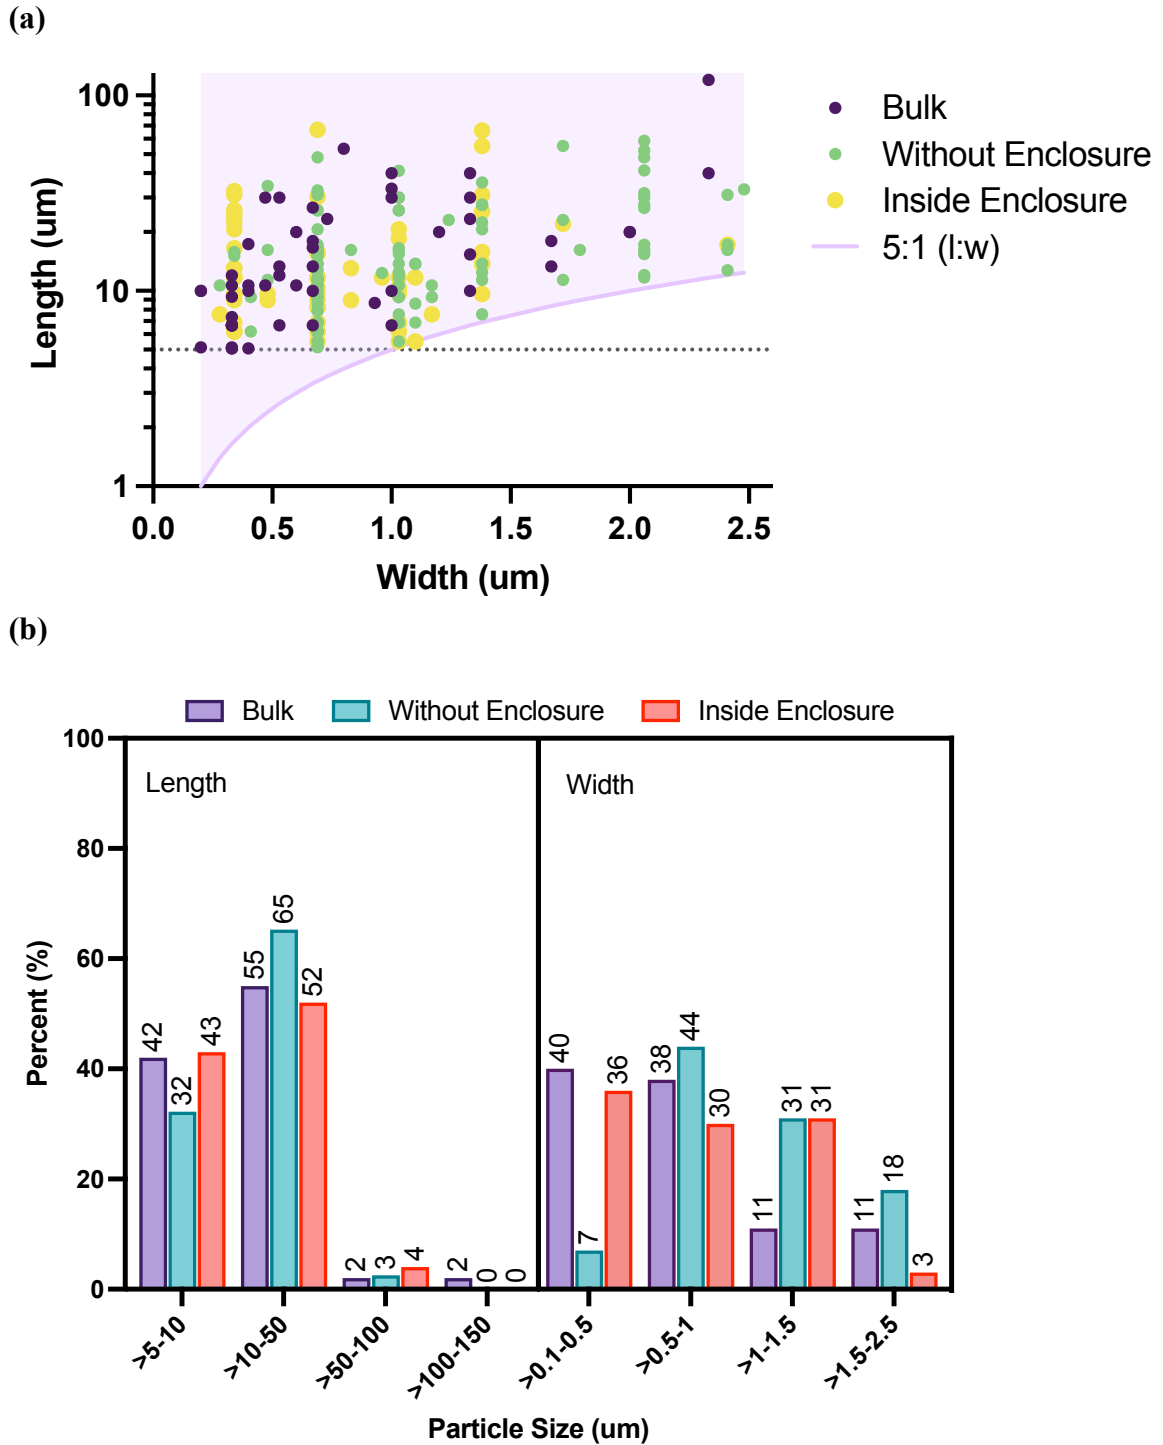

**Figure S5. Aerosol and bulk fiber size distribution (including 0.5 fiber counts).** RCFs greater than 5  $\mu\text{m}$  in length, less than 3  $\mu\text{m}$  in width, and with a  $> 5:1$  length:width aspect ratio, are counted by TEM. (a) Grey dotted line highlights the 5  $\mu\text{m}$  length minimum; purple curve represents 5:1 length:width aspect ratio for each measured particle width. (Includes  $\frac{1}{2}$  fiber counts—see methods).

(a)

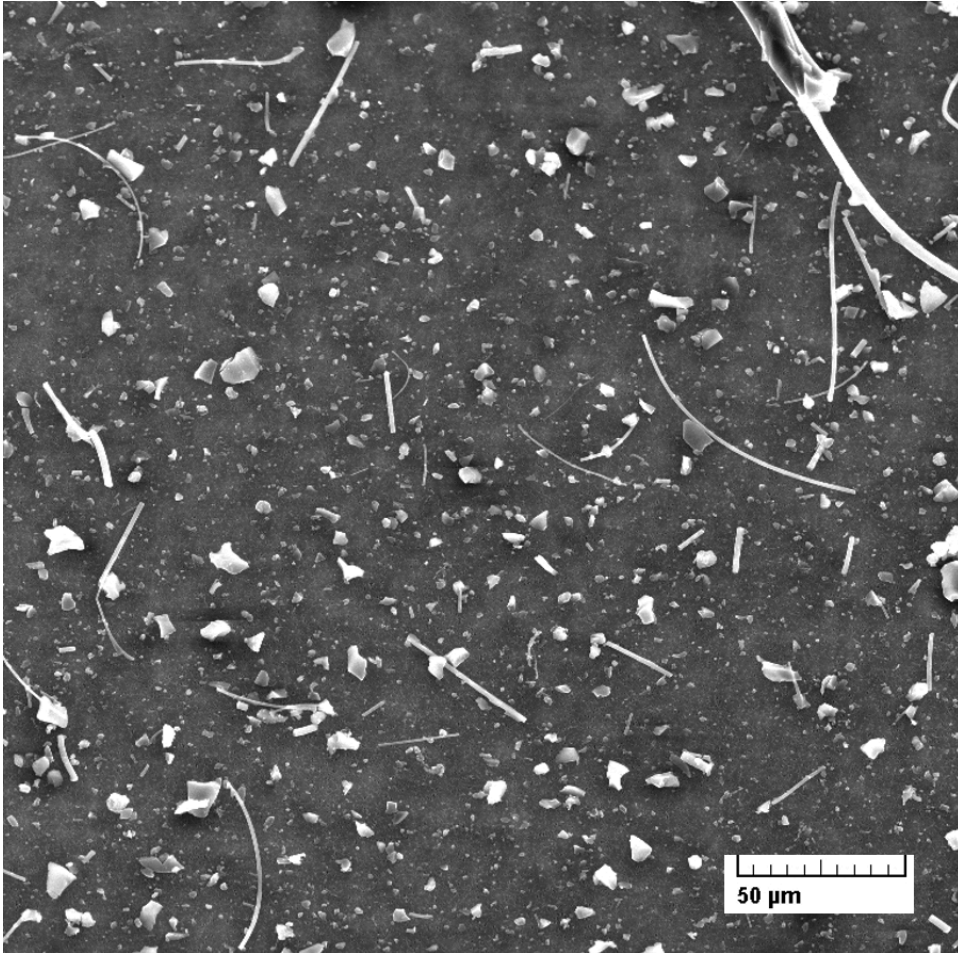

(b)

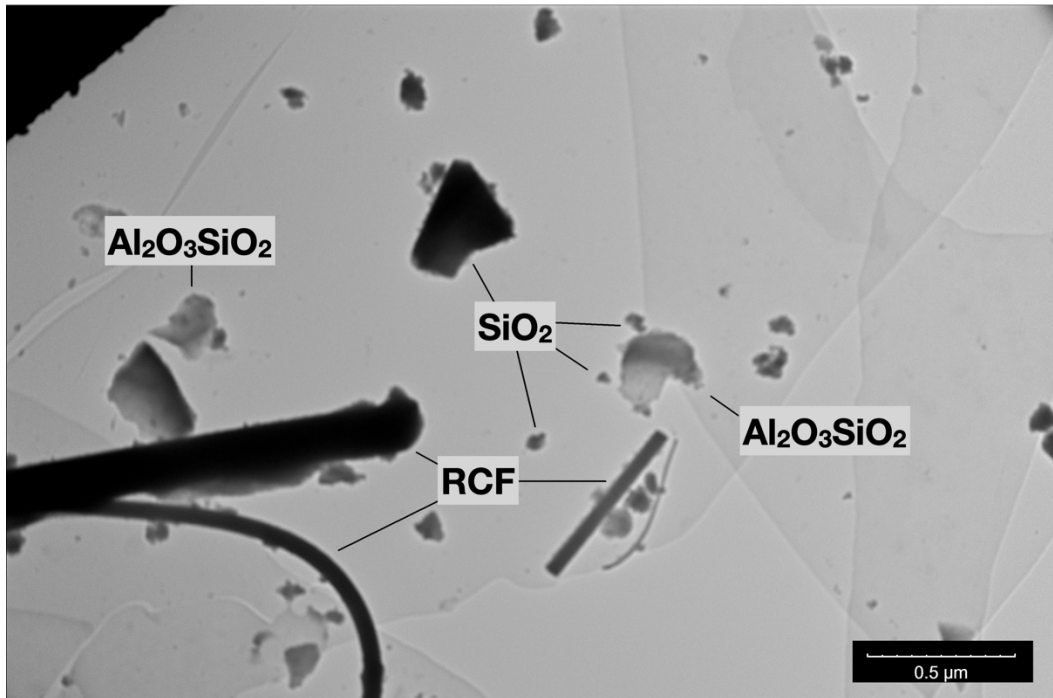

(c)

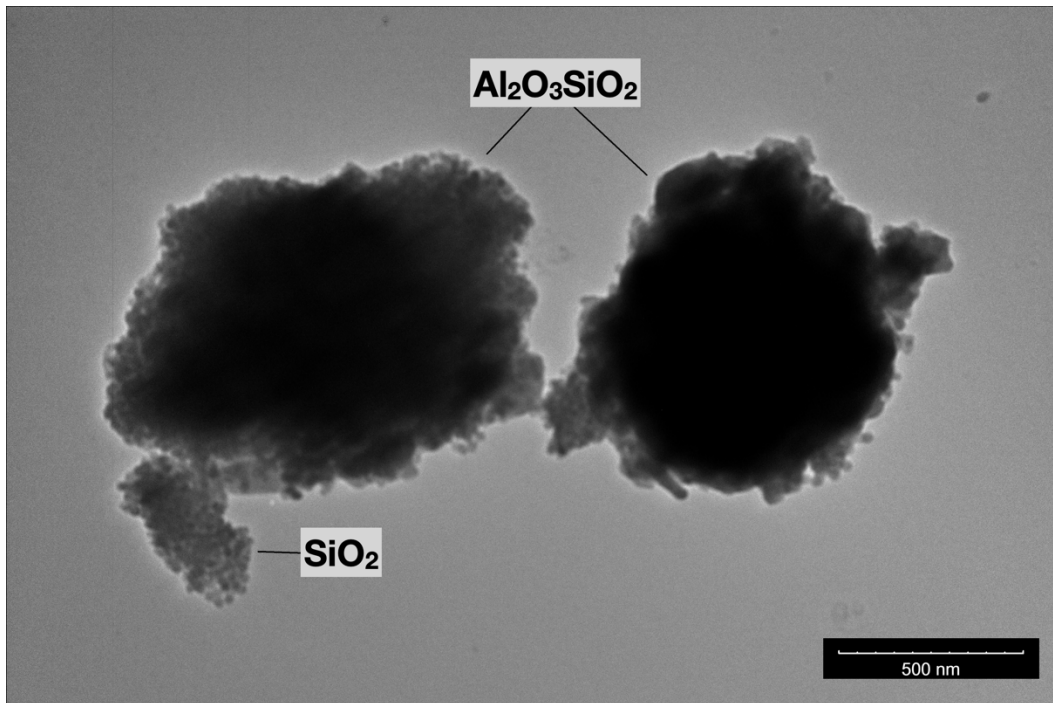

**Figure S6. Bulk material images and chemical composition.** SEM (a) and TEM (b, c) images of bulk RCF material.
